# Supplementary material for: Rational design of an HClO-specific triggered self-immolative fluorescent turn-on sensor and its bioimaging applications
Source: Royal Society of Chemistry journal article supplement (doi:10.1039/d1tb01721g), 2021-01-01
Supplement: d1tb01721g1.pdf [file d1tb01721g1.pdf]

## Supporting Information

### **Rational design of an HClO-specific triggered self-immolative fluorescent turn-on sensor and its bioimaging applications**

Xiao-Bo Wang<sup>a,b</sup>, Da-Long Zhang<sup>c</sup>, Hui-Jing Li<sup>a,\*</sup>, Xuhao Lu<sup>a</sup>, Quanze Liu<sup>a</sup>, and Yan-Chao Wu<sup>a,b\*</sup>

<sup>a</sup> *Weihai Marine Organism & Medical Technology Research Institute, Harbin Institute of Technology, Weihai 264209, China*

<sup>b</sup> *Henan Key Laboratory of Biomolecular Recognition and Sensing (Shangqiu Normal University).*

<sup>c</sup> *Tianjin Disha Pharmaceutical Technology Development Co., Ltd, Tianjin 300071, China*

|                                                                                       |      |
|---------------------------------------------------------------------------------------|------|
| Main Instruments and Reagents.....                                                    | S-3  |
| Preparation of reactive oxygen species (ROS) and reactive nitrogen species (RNS)..... | S-3  |
| The synthesis of Compound <b>1</b> , <b>2</b> , <b>RE-NH</b> and <b>RE-BTC</b> .....  | S-4  |
| Determination of the detection limits.....                                            | S-6  |
| Cytotoxicity assays.....                                                              | S-6  |
| Copies of NMR and mass spectra.....                                                   | S-10 |
| References.....                                                                       | S-17 |

**Table S1** Comparison of Fluorescent Sensors for HClO Detection

| Sensors                                                                             | Time needed to reach FI plateau | Detection media                            | LOD      | Applications                                                        | ref |
|-------------------------------------------------------------------------------------|---------------------------------|--------------------------------------------|----------|---------------------------------------------------------------------|-----|
| 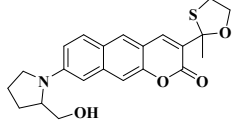   | within seconds                  | PBS containing 1% DMSO                     | 34.8     | Cell imaging, Tissue imaging                                        | 1   |
|    | 4 s                             | DMSO:PBS = 3:7                             | 17.3 nM  | Cell imaging, Zebrafish imaging, Mouse arthritis imaging            | 2   |
|   | 1 s                             | EtOH:PBS = 1:9                             | 0.56 nM  | Cell imaging                                                        | 3   |
|  | 25 s                            | PBS                                        | 2.37 nM  | Cell imaging                                                        | 4   |
|  | 1 h                             | Tris-HCl buffer (10 mM MgCl <sub>2</sub> ) | 33 nM    | Cell imaging, Mouse imaging                                         | 5   |
|  | —                               | DMF:PBS = 1:1                              | 59 nM    | Cell imaging, Zebra fish imaging, Liver Disease Mouse Model imaging | 6   |
|  | 3 s                             | PBS                                        | 0.116 nM | Cell imaging, Zebra fish imaging                                    | 7   |
|  | 65 s                            | HEPES:MeOH = 4:1                           | 0.47 μM  | Cell imaging, C. elegans imaging, Mouse imaging                     | 8   |
|  | 1 min                           | PBS:DMSO = 95:5                            | 4.37 μM  | Cell imaging, Tissue imaging, Mouse imaging                         | 9   |

|                                                                                   |       |                       |          |                                                                       |           |
|-----------------------------------------------------------------------------------|-------|-----------------------|----------|-----------------------------------------------------------------------|-----------|
| 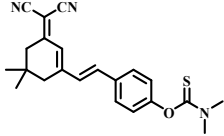 | 3 s   | 100% aqueous solution | 88.06 nM | Cell imaging                                                          | 10        |
|  | 2 min | PBS                   | 49.1 nM  | Cell imaging, Zebrafish imaging, Mouse arthritis imaging              | 11        |
|  | 100 s | PBS                   | 16.1 nM  | Cell imaging, Mouse arthritis imaging                                 | 12        |
|  | 10 s  | PBS                   | 16.8 nM  | Test strips, Cell imaging, Zebrafish imaging, Mouse arthritis imaging | This work |

## Main Instruments and Reagents

All reagents in this work were purchased from commercial sources. Column chromatography silica gel used in the experiment was 200–300 mesh. The NMR spectra were recorded on the AVANCE II spectrometer with tetramethylsilane (TMS) as the reference. High resolution mass spectrometry analysis (HRMS) was carried out by Bruker APEX IV spectrometer. T6 new century spectrometer was used for UV-Visible spectrum measurements. All the Fluorescence spectra measurements were carried out on the FluoroMax-4 fluorescence spectrophotometer. Fluorescence imaging of cells and zebra fish were carried out on OLYMPUS FV1200 MPE confocal imaging system. Fluorescence imaging of mouse were performed on a PerkinElmer IVIS Spectrum imaging system.

## Procedure for spectral measurements

The sensor **RESCIO** was dissolved in dimethyl sulfoxide (DMSO) to prepare a 1 mM stock solution. During the test, an appropriate volume of stock solution was diluted to 10  $\mu$ M with 10 mM PBS solution (pH = 7.4), and then shaken well enough for testing. HClO was diluted to 1 mM

in deionized water using NaClO solution with 14.5% effective chlorine content, and then diluted to the appropriate concentration for testing as required. Other ROS/RNS were then diluted to the appropriate concentration in the buffer solution as required for the test. If not stated, the excitation wavelength was 560 nm, and the emission wavelength was collected at 565–700 nm for all fluorescence tests.

### **Preparation of reactive oxygen species (ROS) and reactive nitrogen species (RNS)**

**HOCl** The concentration of HOCl was determined by using its molar extinction coefficient of  $391 \text{ M}^{-1}\text{cm}^{-1}$  at 292 nm before use.

**O<sub>2</sub><sup>-</sup>** Superoxide was generated from KO<sub>2</sub>. KO<sub>2</sub> and 18-crown-6 ether (2.5 eq) was dissolved in DMSO to afford a 0.25 M solution.

**•HO** Hydroxyl radical was generated by the Fenton reaction. To prepare •OH solution, hydrogen peroxide (H<sub>2</sub>O<sub>2</sub>, 10 eq) was added to Fe(ClO<sub>4</sub>)<sub>2</sub> in deionised water.

**NO** Nitric oxide was generated from potassium nitroprusside dihydrate.

**<sup>1</sup>O<sub>2</sub>** Singlet oxygen was generated from the Na<sub>2</sub>MoO<sub>4</sub>-H<sub>2</sub>O<sub>2</sub> system in 0.05 M carbonate buffer of pH 10.5

**ONOO<sup>-</sup>** Simultaneously, 0.6 M KNO<sub>2</sub>, 0.6 M in HCl, 0.7 M in H<sub>2</sub>O<sub>2</sub> was added at to a 3 M NaOH solution at 0 °C. The concentration of peroxyxynitrite was estimated by using extinction coefficient of  $1670 \text{ cm}^{-1} \text{ M}^{-1}$  at 302 nm in 0.1 M sodium hydroxide aqueous solutions.

### **The synthesis of Compound 1, 2, RE-NH and RE-BTC**

*Synthesis of compound 2:* To a solution of 4-Hydroxybenzaldehyde (0.30 g, 2.46 mmol) in DCM (5 mL) was added N,N-Dimethylaminothioformyl chloride (0.30 g, 2.46 mmol) at room

temperature. Then two drops Et<sub>3</sub>N was added into the reaction solution. The reaction mixture was stirred for 3 h at room temperature. The organic solvent was removed in vacuum to afford the compound 1 for use in the next step. To a solution of compound 1 (0.20 g, 0.96 mmol) was added NaBH<sub>4</sub> (40 mg, 1.0 mmol) at 0 °C. The reaction mixture was stirred for 0.5 h. The mixture was poured into ice water and extracted with DCM. The organic layer was dried with Na<sub>2</sub>SO<sub>4</sub> and concentrated to get compound 2 without further purification. <sup>1</sup>H NMR (400 MHz, CDCl<sub>3</sub>): δ 7.49 (d, *J* = 8.4 Hz, 2H), 7.06 (d, *J* = 8.4 Hz, 2H), 4.68 (s, 2H), 3.46 (s, 3H), 3.36 (s, 3H); <sup>13</sup>C NMR (100 MHz, CDCl<sub>3</sub>): δ 187.8, 153.4, 138.7, 127.8, 122.8, 64.7, 43.3, 38.8.

*Synthesis of compound RE-NH*: A solution of Zn powder (1.30 g, 19.91 mmol), resazurin sodium salt (1.00 g, 3.98 mmol), and glacial acetic acid (20 mL) were stirred vigorously at ambient temperature for 2 h under an atmosphere of N<sub>2</sub>. After the reaction mixture was rapidly removed under vacuum and the residues were dissolved in acetone (20 mL). *N, N*-dimethyl-4-aminopyridine (0.49 g, 3.98 mmol) was added to the reaction solution in a portion. Then acetic anhydride (0.76 mL, 7.96 mmol) was added dropwisely to the reaction solution. The mixture was stirred for 3 h. Removal of Zn powder by Celite filtration, the filtrate mixture was evaporated under vacuum to get a yellow crude product. Compound **RE-NH** was isolated as a white solid by silica-gel column chromatography in 71% yield (850 mg). <sup>1</sup>H NMR (400 MHz, Acetone-*d*<sub>6</sub>): δ 7.35 (s, 1H), 6.47–6.54 (m, 6H), 2.20 (s, 6H); <sup>13</sup>C NMR (100 MHz, Acetone-*d*<sub>6</sub>): δ 169.8, 145.7, 143.7, 130.9, 117.6, 114.0, 110.6, 20.9; HRMS (ESI): calcd for C<sub>16</sub>H<sub>13</sub>NO<sub>5</sub> ([M+Na]<sup>+</sup>): 322.0686, found: 322.0687.

*Synthesis of compound RE-BTC*: Under an N<sub>2</sub> atmosphere, to a solution of compound **RE-NH** (0.50 g, 1.67 mmol), Na<sub>2</sub>CO<sub>3</sub> (0.36 g, 3.34 mmol) and *N, N*-dimethyl-4-aminopyridine (0.20 g,

1.67 mmol) in DCM (10 mL) was added dropwise a solution of triphosgene (0.99 g, 3.34 mmol) in DCM (5 mL) at 0 °C. The reaction mixture was stirred at ambient temperature under an N<sub>2</sub> atmosphere for 3 h. The reaction mixture was poured into ice water and extracted with DCM. The organic layer was dried with Na<sub>2</sub>SO<sub>4</sub>, concentrated, and isolated to get compound **RE-BTC** as a white solid by silica-gel column chromatography in 76% yield (460 mg). <sup>1</sup>H NMR (400 MHz, CDCl<sub>3</sub>): δ 7.60 (d, *J* = 8.8 Hz, 2H), 6.97 (d, *J* = 2.6 Hz, 2H), 6.93 (dd, *J* = 2.6, 8.8 Hz, 2H), 2.31 (s, 6H); <sup>13</sup>C NMR (100 MHz, CDCl<sub>3</sub>): δ 168.9, 151.2, 149.7, 148.5, 126.1, 125.6, 117.1, 111.0, 21.1.

### Determination of the detection limits

The detection limit was calculated according to the method used in the previous literature.<sup>13–16</sup> The fluorescence intensity at 590 nm was plotted versus the concentrations of HClO. The detection limit was calculated with the following equation:

$$\text{Detection limit} = 3 \sigma / k$$

Where  $\sigma$  is the standard deviation of blank measurement, *k* is the slope between the fluorescence intensity versus HClO concentration.

### Cytotoxicity assays

The cell viability of RAW 264.7 cells, treated with sensor **RESCIO**, was assessed by a cell counting kit-8 (CCK-8; Dojindo Molecular Technologies, Tokyo, Japan). Briefly, RAW 264.7 cells, seeded at a density of  $1 \times 10^6$  cells·mL<sup>-1</sup> on a 96-well plate, were maintained at 37 °C in a 5% CO<sub>2</sub>/95% air incubator for 12 h. Then the live cells were incubated with various concentrations (0, 5, 10, 20, and 30 μM) of sensor **RESCIO** suspended in culture medium for 24 h. Subsequently, CCK-8 solution was added into each well for 2 h, and absorbance at 450 nm was measured.

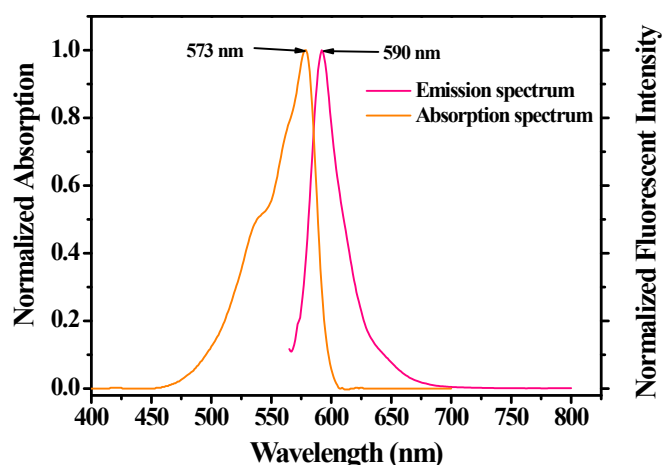

**Figure S1** After addition of HClO, the normalized fluorescence emission and absorption spectra of the sensor **RESCIO**.

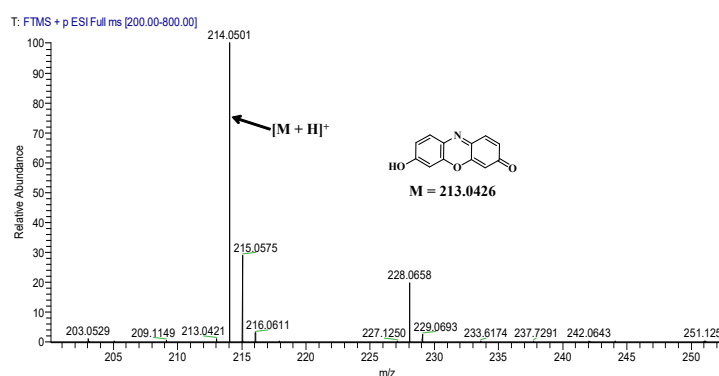

**Figure S2** HRMS of reaction product of the sensor **RESCIO** and HClO.

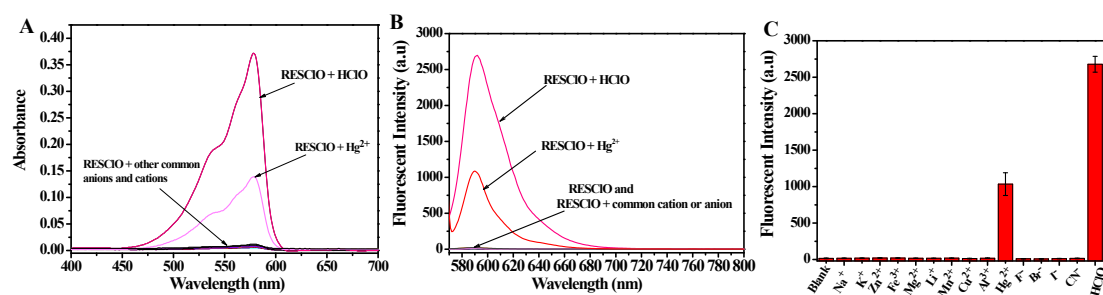

**Figure S3** Absorption (A) and fluorescence (B) spectra changes of sensor **RESCIO** (10  $\mu$ M) in PBS buffer solution (10 mM, pH = 7.4) in the presence of HClO (20  $\mu$ M) and other species (50  $\mu$ M), including  $\text{Na}^+$ ,  $\text{K}^+$ ,  $\text{Zn}^{2+}$ ,  $\text{Fe}^{3+}$ ,  $\text{Mg}^{2+}$ ,  $\text{Li}^+$ ,  $\text{Mn}^{2+}$ ,  $\text{Cu}^{2+}$ ,  $\text{Al}^{3+}$ ,  $\text{Hg}^{2+}$ ,  $\text{F}^-$ ,  $\text{Br}^-$ ,  $\text{I}^-$ ,  $\text{CN}^-$ ; (C) Fluorescence intensity at 590 nm changes after addition of different species for 1 min.

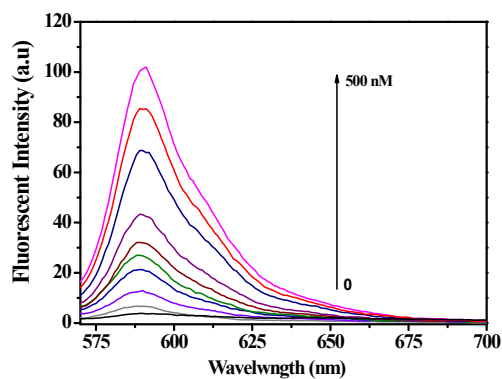

**Figure S4** Fluorescence spectra of the sensor **RESCIO** (10  $\mu\text{M}$ ) in PBS buffer solution (10 mM, pH = 7.4) after addition of different low concentrations of HClO (0, 30, 50, 80, 100, 150, 200, 300, 400, 500 nM).

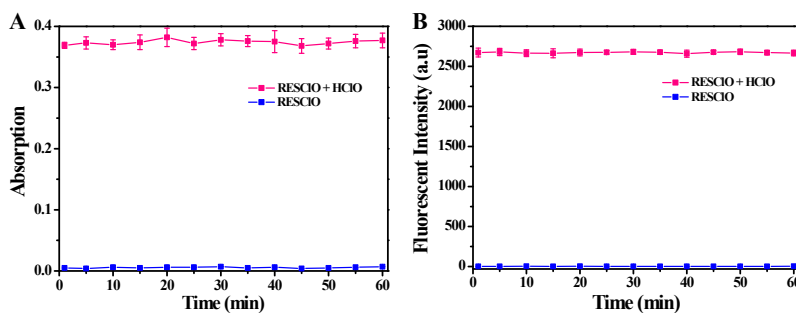

**Figure S5** The variation of absorption (A) and fluorescence intensity (B) of the sensor **RESCIO** (10  $\mu\text{M}$ ) in PBS buffer solution (10 mM, pH = 7.4) with time before and after the addition of HClO (20  $\mu\text{M}$ ).

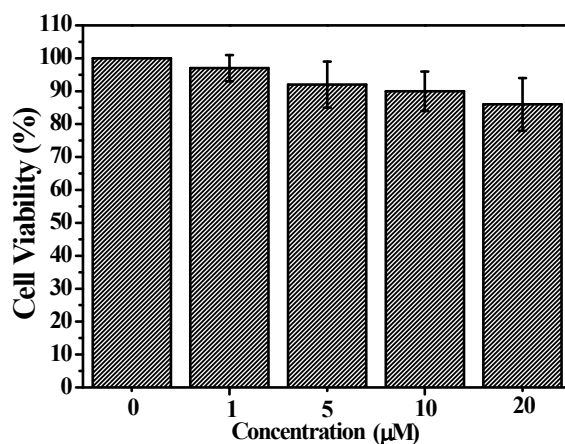

**Figure S6** Viability of RAW 264.7 cells treated with various concentrations (0 - 20  $\mu\text{M}$ ) of **RESCIO** for 24 h. Error bars represent mean values  $\pm$  SD. (n = 3).



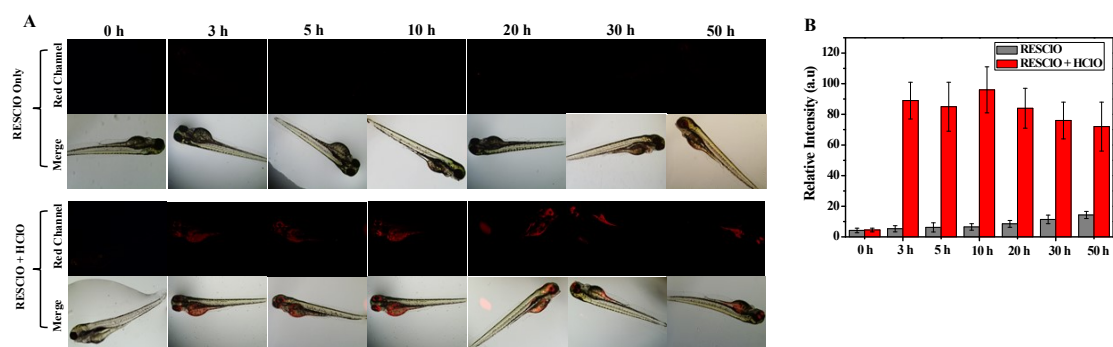

**Figure S7** (A) Fluorescent imaging images of zebrafish incubated with the sensor **RESCIO** (10  $\mu$ M) for different times in the presence or absence of HClO (10  $\mu$ M). (B) Relative fluorescence intensity from corresponding zebra fish.

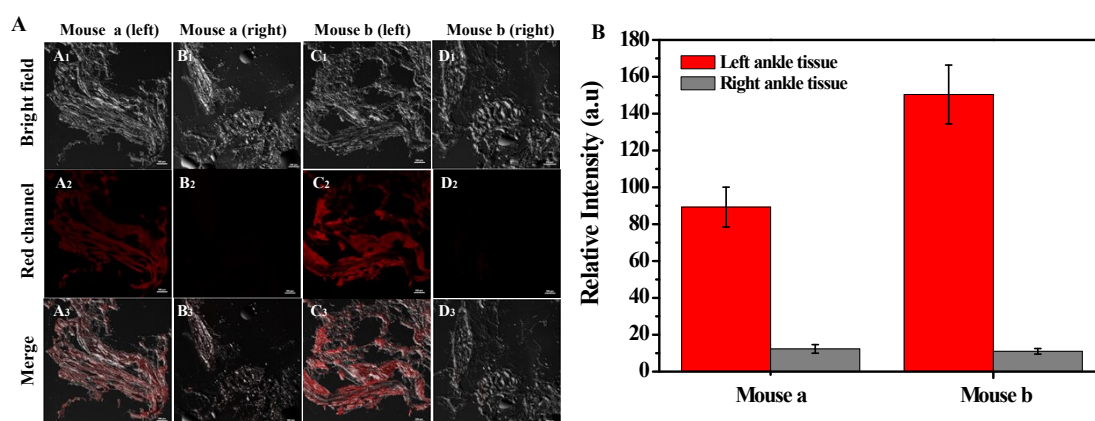

**Figure S8** Fluorescence images of frozen slice prepared from mice with different degrees of arthritis induced by 5 mg/mL  $\lambda$ -carrageenan ( $A_1$ - $A_3$ : 50  $\mu$ L;  $C_1$ - $C_3$ : 100  $\mu$ L). Arthritic tissue: Slice isolated from the arthritic area of the left ankle ( $A_1$ - $A_3$  and  $C_1$ - $C_3$ ). Control: Slice isolated from the right ankle ( $B_1$ - $B_3$  and  $D_1$ - $D_3$ ).  $\lambda_{ex}$  = 559 nm,  $\lambda_{em}$  = 580–620 nm for the red channel.

Copies of NMR and mass spectra

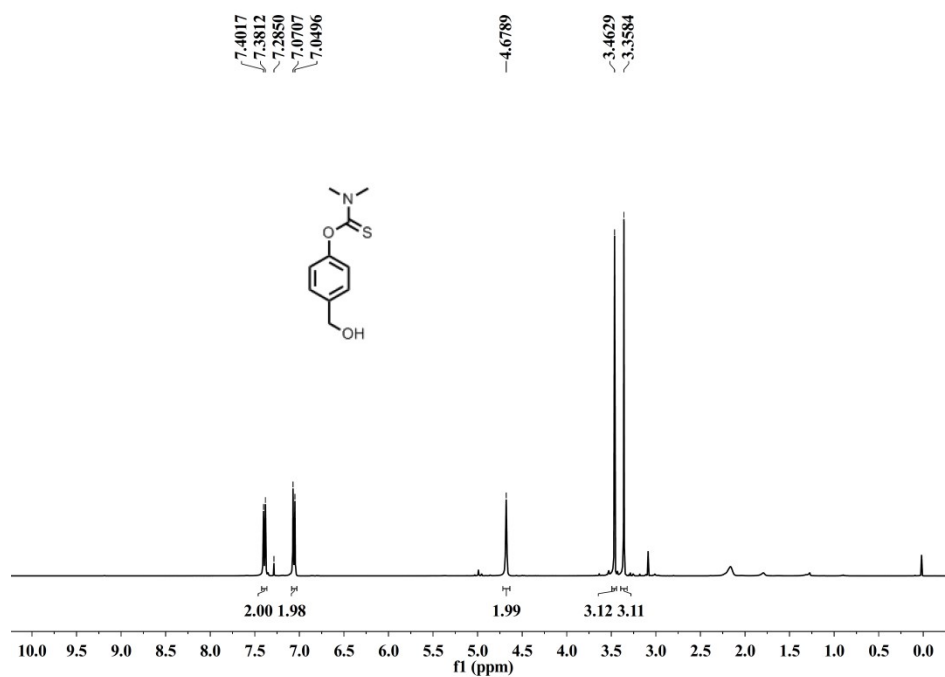

Figure S8 <sup>1</sup>H NMR spectrum of compound 2 in CDCl<sub>3</sub>.

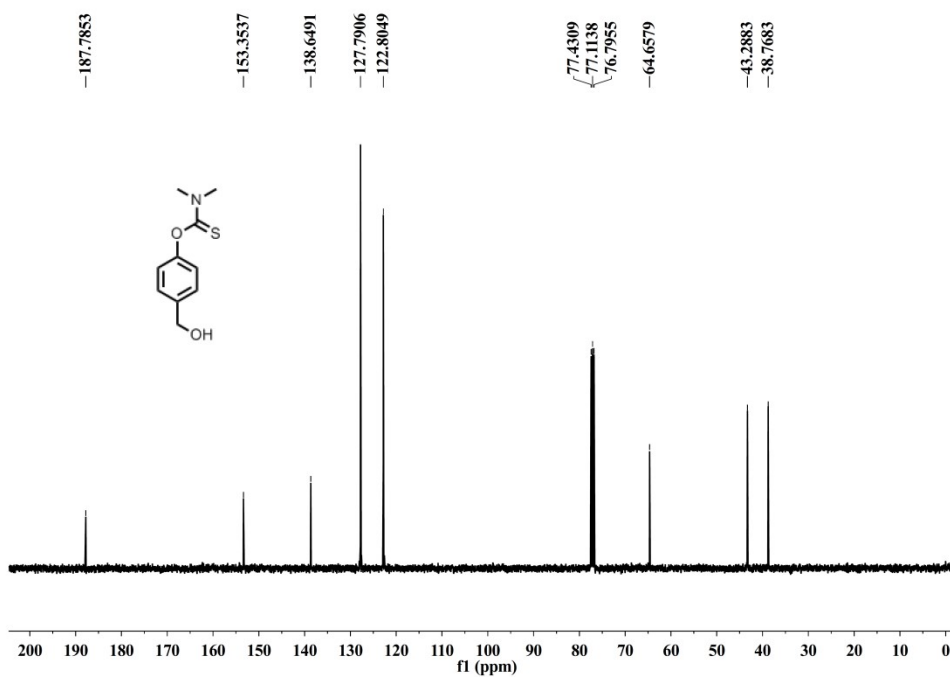

Figure S9 <sup>13</sup>C NMR spectrum of compound 2 in CDCl<sub>3</sub>.

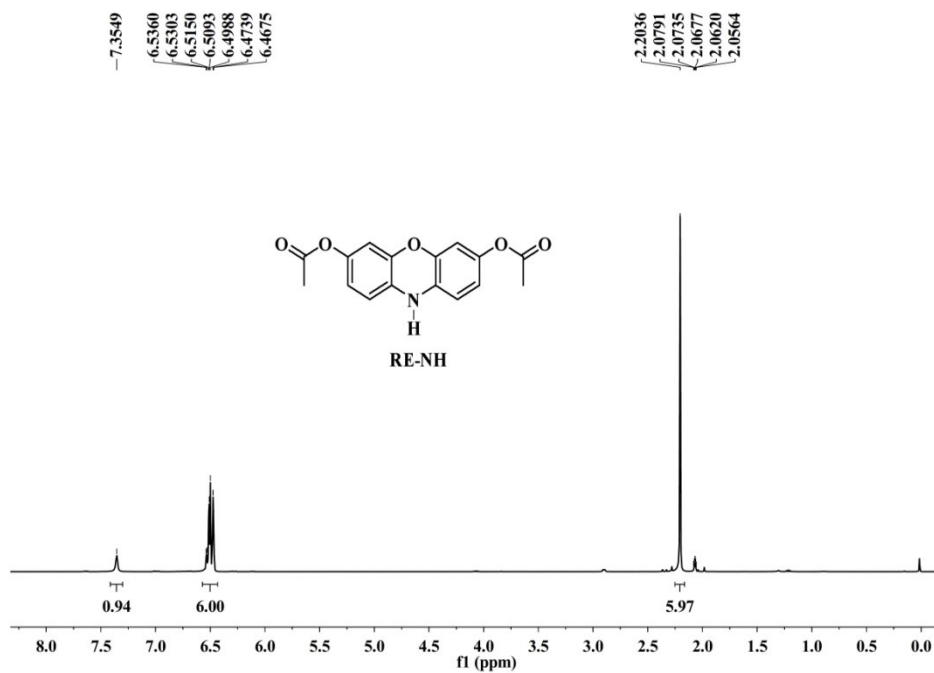

Figure S10  $^1\text{H}$  NMR spectrum of compound RE-NH in Acetone- $d_6$ .

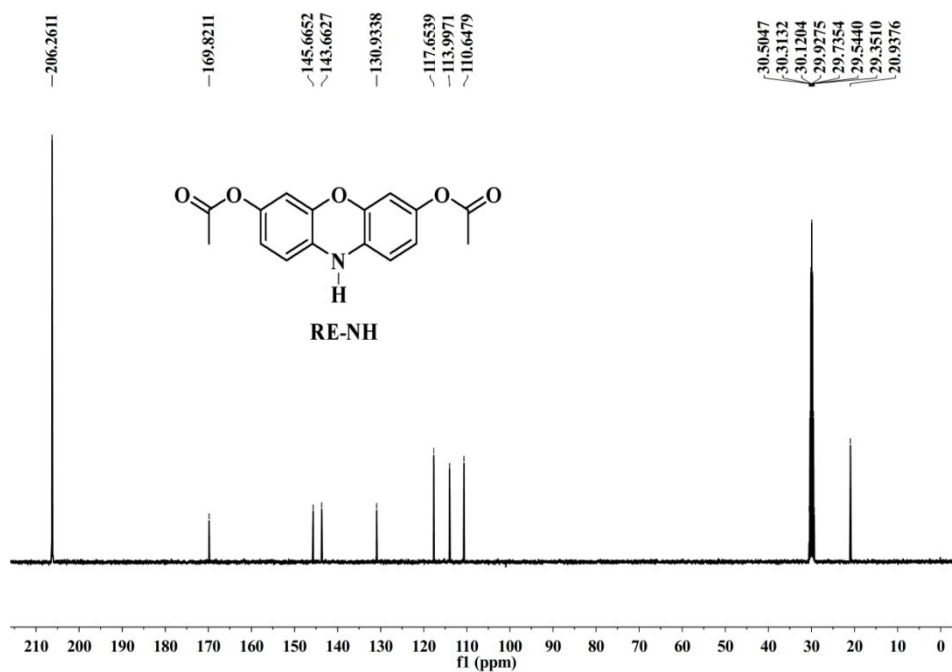

Figure S11  $^{13}\text{C}$  NMR spectrum of compound RE-NH in Acetone- $d_6$ .

T: FTMS + p ESI Full ms [200.00-800.00]

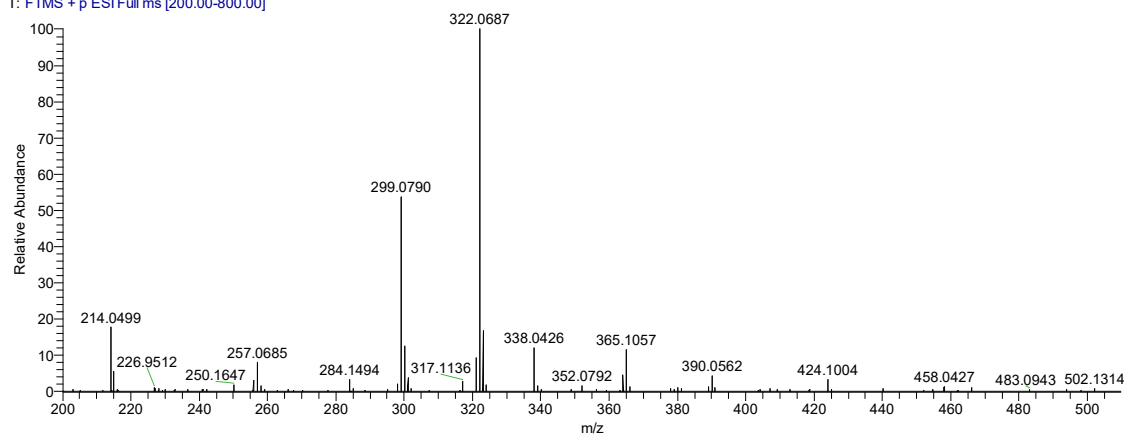

Figure S12 HRMS spectrum of compound RE-NH

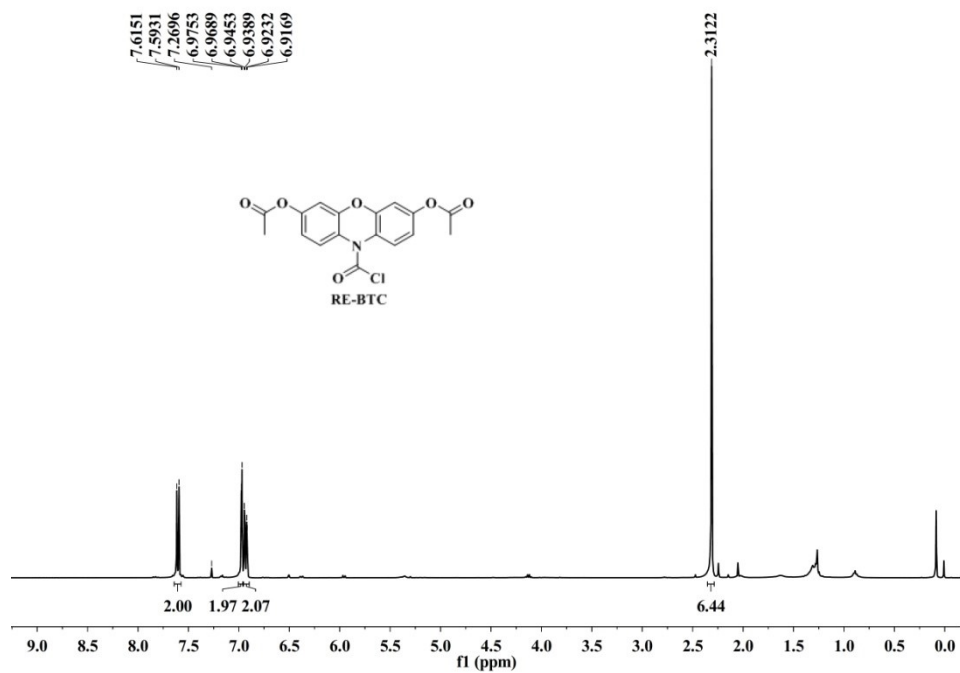

Figure S13 <sup>1</sup>H NMR spectrum of compound RE-BTC in CDCl<sub>3</sub>.

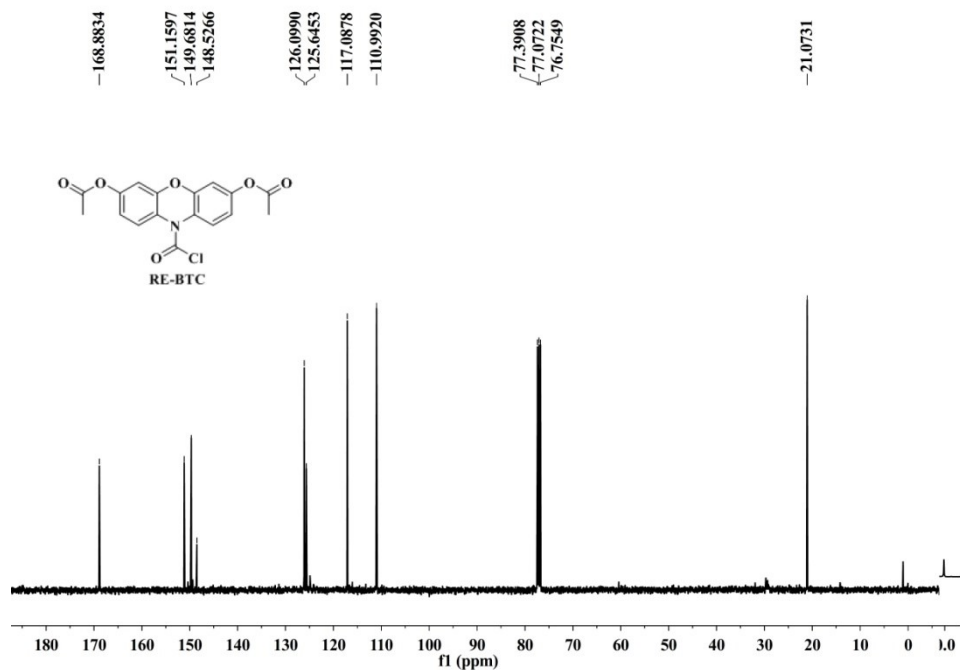

Figure S14  $^{13}\text{C}$  NMR spectrum of compound RE-BTC in  $\text{CDCl}_3$ .

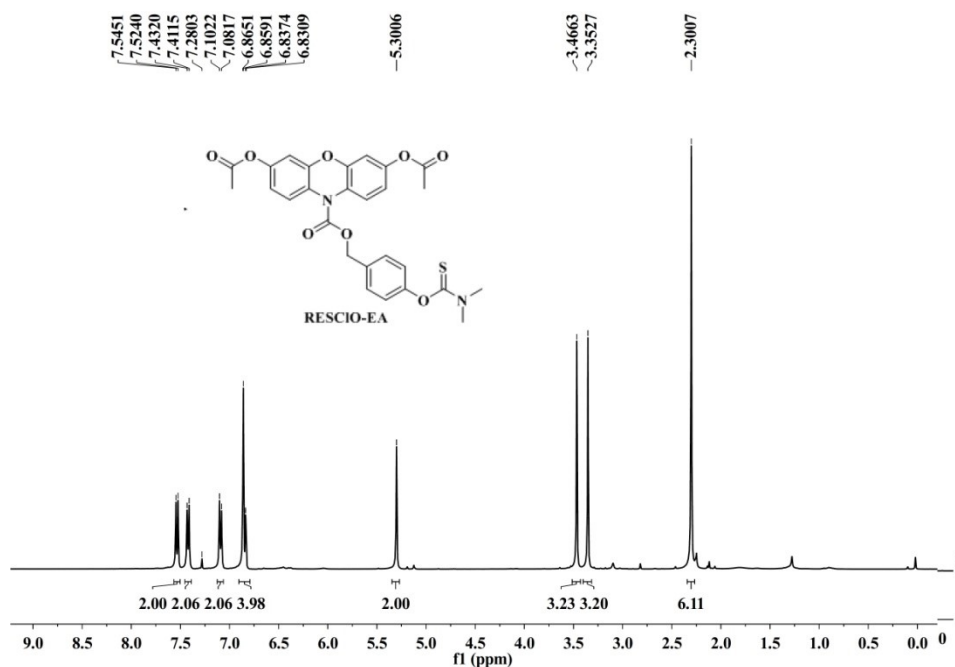

Figure S15  $^1\text{H}$  NMR spectrum of compound RESCIO-EA in  $\text{CDCl}_3$ .

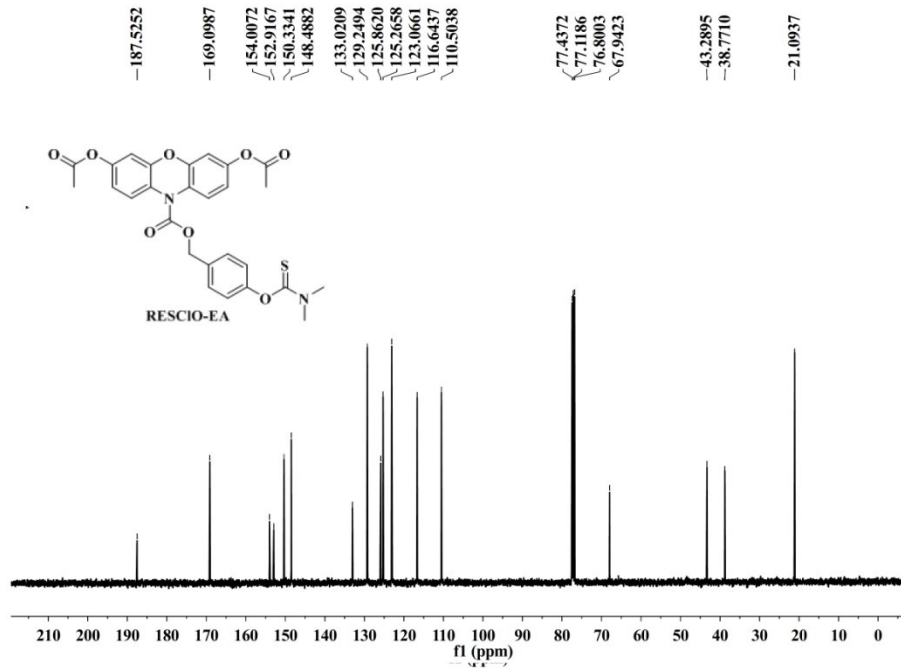

Figure S16  $^{13}\text{C}$  NMR spectrum of compound RESCIO-EA in  $\text{CDCl}_3$ .

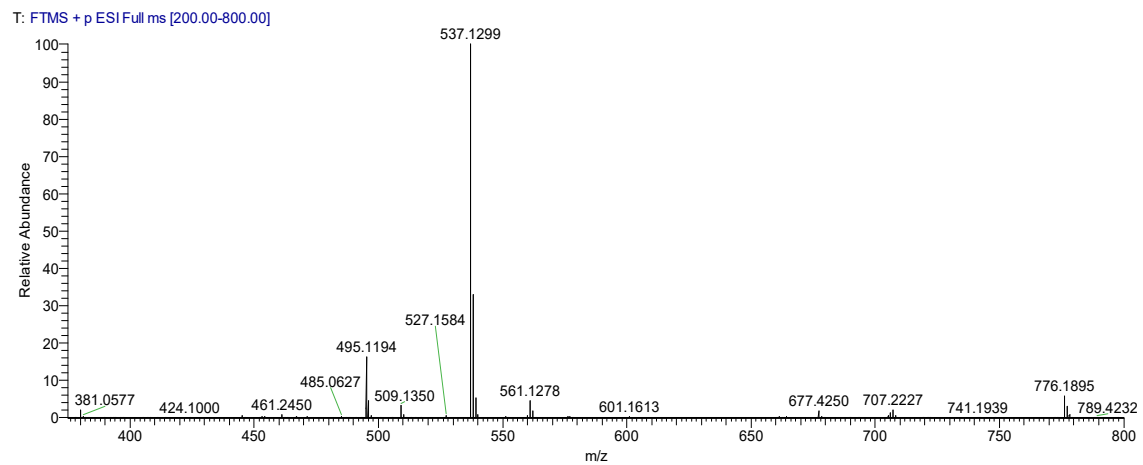

Figure S17 HRMS spectrum of RESCIO-EA.

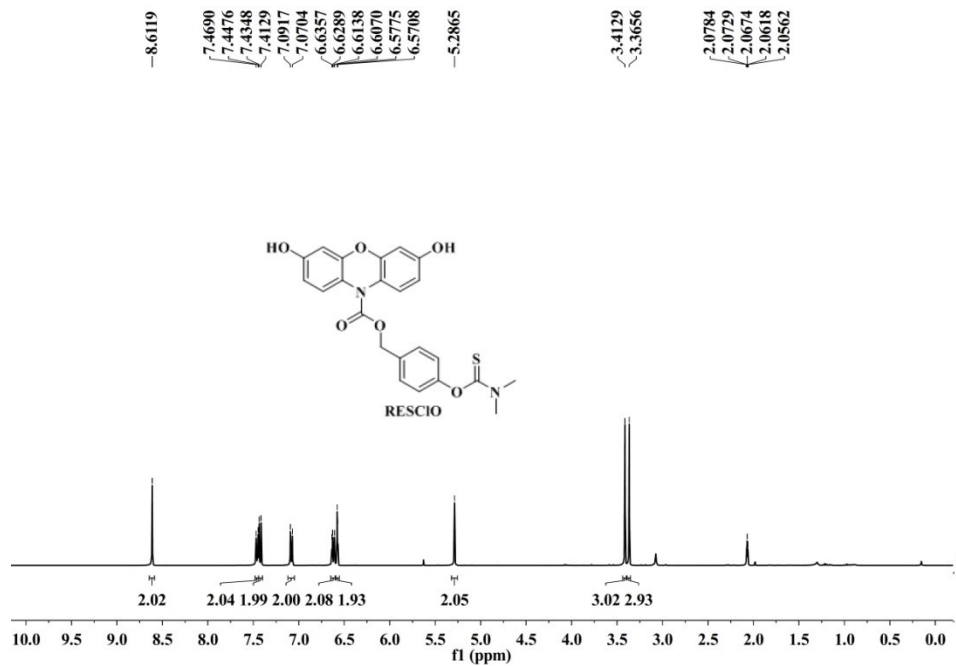

Figure S18  $^1\text{H}$  NMR spectrum of compound RESCIO in Acetone- $d_6$ .

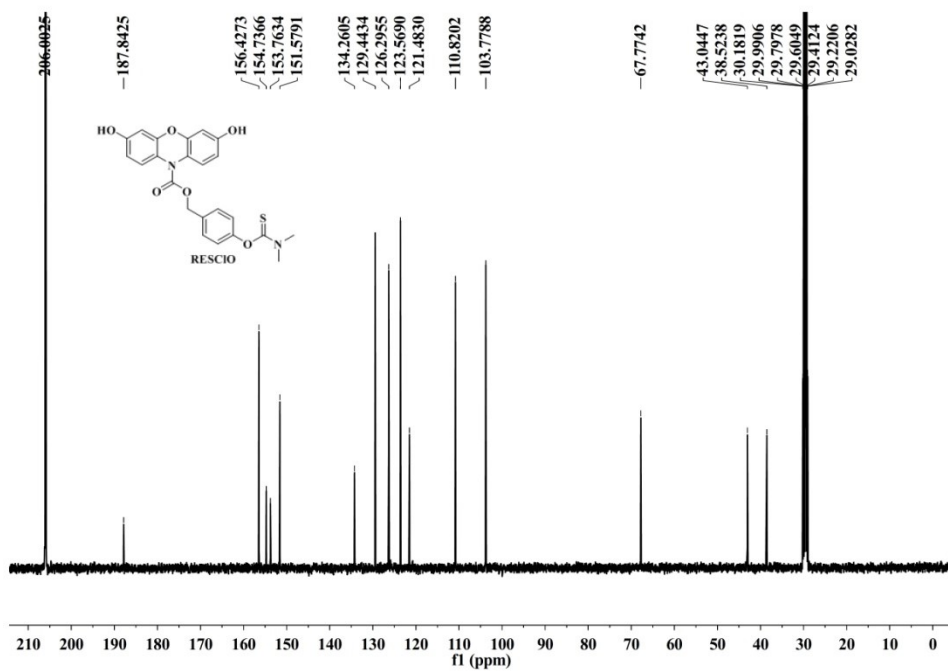

Figure S19  $^{13}\text{C}$  NMR spectrum of compound RESCIO in Acetone- $d_6$ .

T: FTMS + p ESI Full ms [200.00-800.00]

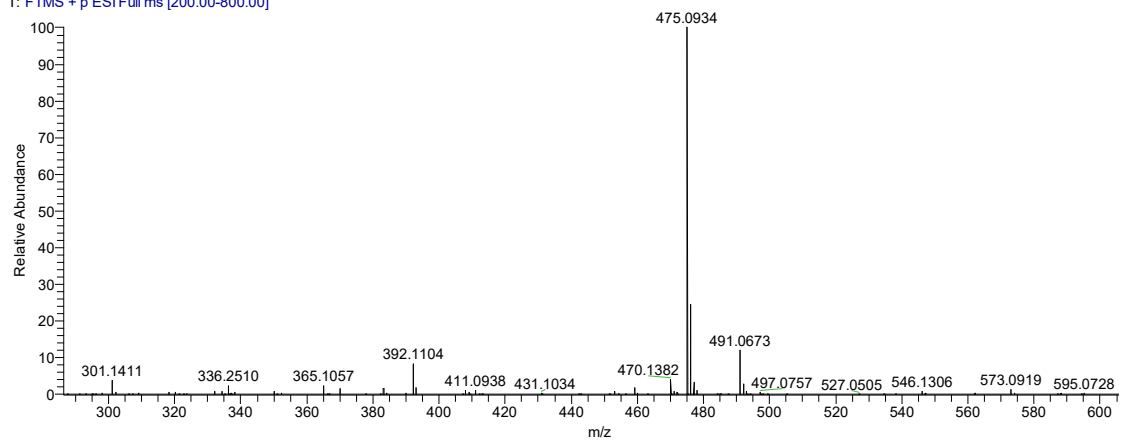

**Figure S20** HRMS spectrum of **RESCIO**.



## References

- [1] Y. W. Jun, S. Sarkar, S. Singha, Y. J. Reo, H. R. Kim, J.-J Kim, K. H Ahn, A two-photon fluorescent probe for ratiometric imaging of endogenous hypochlorous acid in live cells and tissues. *Chem. Comm.*, 53(2017), 10800–10803.
- [2] H. Feng, Z. Zhang, Q. Meng, H. Jia, Y. Wang, R. Zhang, Rapid Response Fluorescence Probe Enabled In Vivo Diagnosis and Assessing Treatment Response of Hypochlorous Acid-Mediated Rheumatoid Arthritis, *Adv. Sci.* 5 (2018) 1800397.
- [3] H. Zhu, J. Fan, J. Wang, H. Mu, X. Peng, An “enhanced PET”-based fluorescent probe with ultrasensitivity for imaging basal and elesclomol-induced HClO in cancer cells. *J. Am. Chem. Soc.* 136 (2014), 12820–12823.
- [4] Y. Jiang, G. Zheng, Q. Duan, L. Yang, J. Zhang, H. Zhang, D. Ho, Ultra-sensitive fluorescent probes for hypochlorite acid detection and exogenous/endogenous imaging of living cells. *Chem. Comm.* 54 (2018), 7967–7970.
- [5] C. Tang, Y. Gao, T. Liu, Y. Lin, X. Zhang, C. Zhang, X. Li, T. Zhang, L. Du, M. Li, Bioluminescent Probe for Detecting Endogenous Hypochlorite in Living Mice, *Org. Bio. Chem.* 16 (2018) 645–651.
- [6] C. Duan, M. Won, P. Verwilt, J. Xu, H.S. Kim, L. Zeng, J.S. Kim, In Vivo Imaging of Endogenously Produced HClO in Zebrafish and Mice Using a Bright, Photostable Ratiometric Fluorescent Probe, *Anal. Chem.* 91 (2019) 4172–4178.
- [7] C. Liu, Z. Li, C. Yu, Y. Chen, D. Liu, Zhuang, P. Jia, H. Zhu, X. Zhang, Y. Yu, Development of a Concise Rhodamine-Formylhydrazine Type Fluorescent Probe for Highly Specific and Ultrasensitive Tracing of Basal HOCl in Live Cells and Zebrafish, *ACS Sensors* 4 (2019) 2156–

2163.

- [8] D. Shi, S. Chen, B. Dong, Y. Zhang, C. Sheng, T.D. James, Y. Guo, Evaluation of HOCl-Generating Anticancer Agents by an Ultrasensitive Dual-Mode Fluorescent Probe, *Chem. Sci.* 10 (2019) 3715–3722.
- [9] X. Lin, Y. Chen, L. Bao, S. Wang, K. Liu, W. Qin, F. Kong, A Two-Photon near-Infrared Fluorescent Probe for Imaging Endogenous Hypochlorite in Cells, Tissue and Living Mouse, *Dyes Pigments* 174 (2020) 108113.
- [10] Y. Zhang, Y. Ma, Z. Wang, X. Zhang, X. Chen, S. Hou, H. Wang, A Novel Colorimetric and Far-Red Emission Ratiometric Fluorescent Probe for the Highly Selective and Ultrafast Detection of Hypochlorite in Water and Its Application in Bioimaging, *Analyst* 145 (2020) 939–945.
- [11] J.S. Lan, L. Liu, R.F. Zeng, Y.H. Qin, Y. Liu, X.Y. Jiang, A. Aihemaiti, Y. Ding, T. Zhang, R.J. Y. Ho, Rational Modulation of Coumarin-Hemicyanine Platform Based on OH Substitution for Higher Selective Detection of Hypochlorite, *Chem. Comm.* 56 (2020) 1219–1222.
- [12] J.T. Hou, B. Wang, Y. Zou, P. Fan, X. Chang, X. Cao, S. Wang, F. Yu, Molecular Fluorescent Probes for Imaging and Evaluation of Hypochlorite Fluctuations during Diagnosis and Therapy of Osteoarthritis in Cells and in a Mouse Model, *ACS Sensors* 5 (2020) 1949–1958.
- [13] W. Chen, H. Luo, X. Liu, J. W. Foley, X. Song, Broadly Applicable Strategy for the Fluorescence Based Detection and Differentiation of Glutathione and Cysteine/Homocysteine: Demonstration in Vitro and in Vivo, *Anal. Chem.* 88 (2016), 3638-3646.
- [14] Y. C. Liao, P. Venkatesan, L. F. Wei, S. P. Wu, A coumarin-based fluorescent probe for thiols and its application in cell imaging, *Sens. Actuators B: Chem.* 232 (2016), 732-737.
- [15] T. Liu, F. Huo, C. Yin, J. Li, J. Chao, Y. Zhang, A triphenylamine as a fluorophore and

maleimide as a bonding group selective turn-on fluorescent imaging probe for thiols, *Dyes Pigments* 128 (2016), 209-214.

[16] W. Lin, L. Long, W. Tan, A Highly Sensitive Fluorescent Probe for Detection of Benzenethiols in Environmental Samples and Living Cells, *Chem. Comm.* 46 (2010) 1503–1505.
